# Supplementary material for: Uterine and systemic inflammation influences ovarian follicular function in postpartum dairy cows
Source: PubMed Central journal article supplement (PMC5438135; doi:10.1371/journal.pone.0177356), 2017-05-19
Supplement: pone.0177356.s002.pdf [file pone.0177356.s002.pdf]

|                    | Level      | Ov (n = 28) | NOV (n= 25) | <i>P</i> |
|--------------------|------------|-------------|-------------|----------|
| Parity             |            |             |             | 0.61     |
|                    | 2          | 14          | 15          |          |
|                    | 3          | 8           | 7           |          |
|                    | 4          | 6           | 3           |          |
| Calving Ease Score |            |             |             | 0.70     |
|                    | No         |             |             |          |
|                    | assistance | 20          | 15          |          |
|                    | Slight     |             |             |          |
|                    | traction   | 7           | 7           |          |
|                    | Moderate   |             |             |          |
|                    | traction   | 1           | 3           |          |
| Calf Sex           |            |             |             | 0.08     |
|                    | Female     | 15          | 8           |          |
|                    | Male       | 13          | 17          |          |
| Calf weight (Kg)   |            |             |             | 0.30     |
|                    | Average    | 47.04       | 47.12       |          |
|                    | SEM        | 1.18        | 1.07        |          |
| Retained Fetal     |            |             |             |          |
| Membrane           |            |             |             | 0.77     |
|                    | Yes        | 3           | 2           |          |
|                    | No         | 25          | 23          |          |
| Metritis           |            |             |             | 0.062    |

|                             |      |    |    |       |
|-----------------------------|------|----|----|-------|
|                             | Yes  | 4  | 9  |       |
|                             | No   | 24 | 16 |       |
| First Uterine Lavage        |      |    |    |       |
| PMN $\geq$ 35%              |      |    |    | 0.038 |
|                             | Yes  | 16 | 22 |       |
|                             | No   | 11 | 3  |       |
| pH < 8.5                    |      |    |    | 0.008 |
|                             | Yes  | 21 | 10 |       |
|                             | No   | 6  | 15 |       |
| Leukocyte esterase $\geq$ 3 |      |    |    | 0.25  |
|                             | High | 26 | 22 |       |
|                             | Low  | 1  | 3  |       |
| Protein $\geq$ 5            |      |    |    | 0.59  |
|                             | High | 25 | 24 |       |
|                             | Low  | 2  | 1  |       |

---
